# Supplementary material for: Bio-based, self-adhesive, and self-healing ionogel with excellent mechanical properties for flexible strain sensor
Source: Royal Society of Chemistry journal article supplement (doi:10.1039/d1ra06686b), 2021-01-01

## Supporting Information

### **Bio-based, self-adhesive, and self-healing ionogel with excellent mechanical properties for flexible strain sensor†**

Yipeng Zhang<sup>a</sup>, Junhuai Xu<sup>b</sup>, Haibo Wang<sup>b c\*</sup>

<sup>a</sup> West China Hospital of Sichuan University, Chengdu 610041, China.

<sup>b</sup> College of Biomass Science and Engineering, Sichuan University, Chengdu 610065, P R China. E-mail: whb6985@scu.edu.cn

<sup>c</sup> National Engineering Research Center of Clean Technology in Leather Industry, Sichuan University, Chengdu 610065, PR China.

\*Corresponding author. E-mail: whb6985@scu.edu.cn (H. Wang)

Fig. S1. The mechanical properties of IG<sub>2</sub> with and without TA.

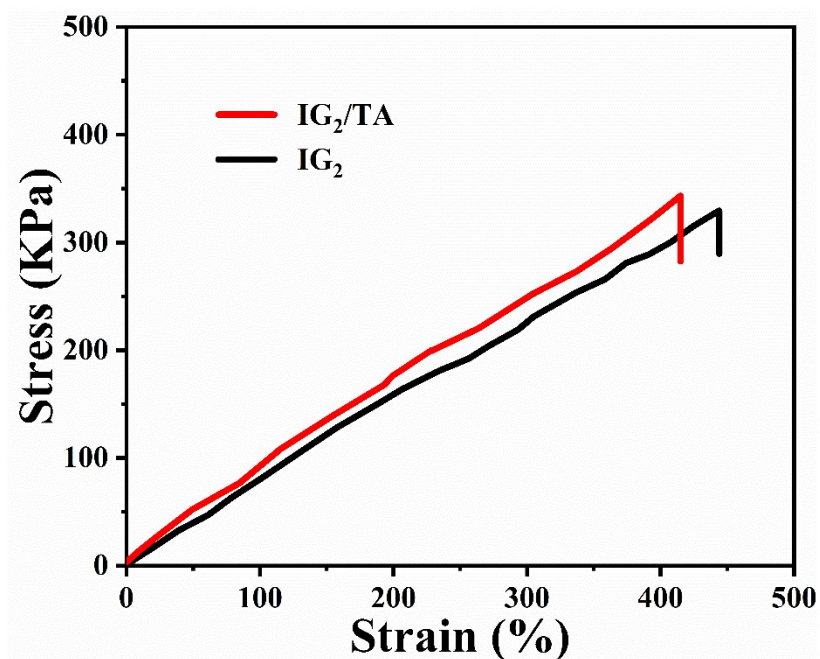

Fig. S2. Comparison of FT-IR spectra of ionogels before and after self-healing.

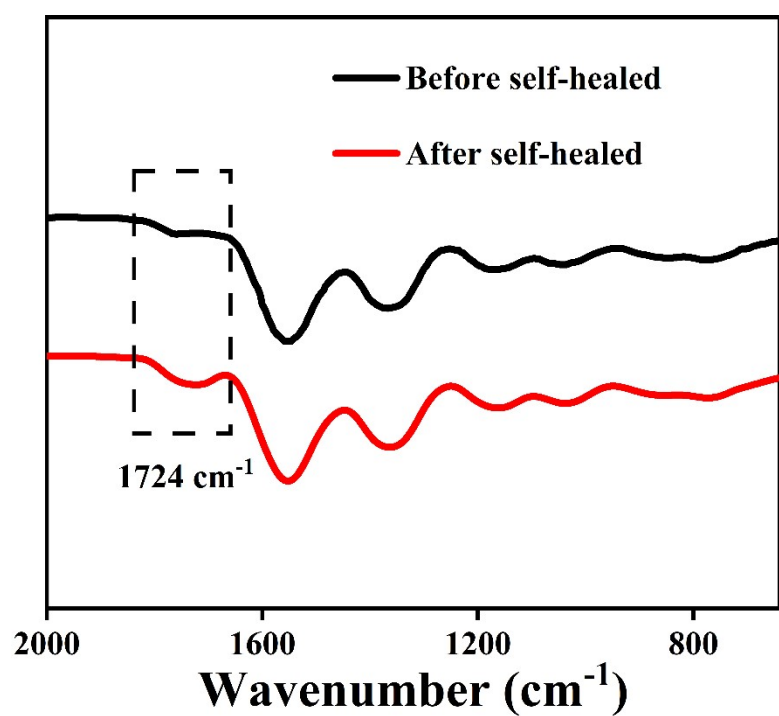

**Fig. S3.** Variation of mechanical properties with the time of self-healing.

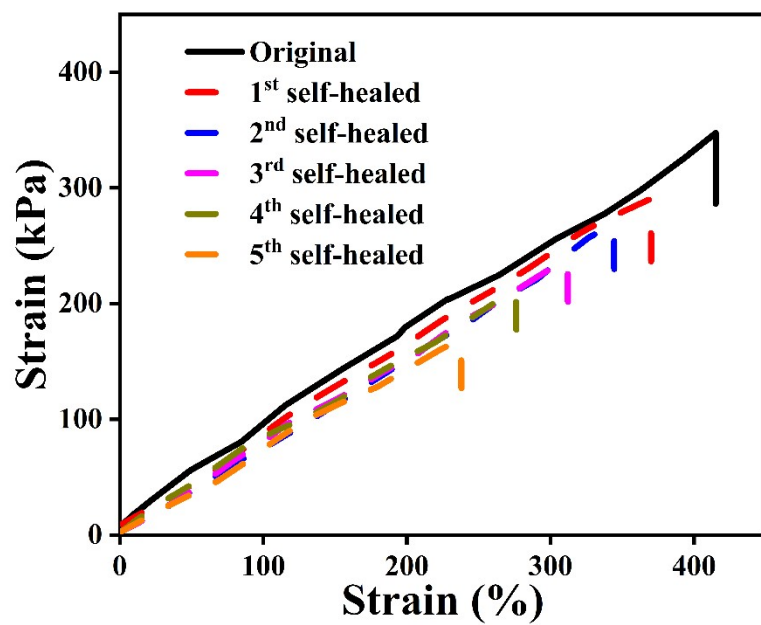

**Fig. S4.** The sensing performance of IG<sub>2</sub>/TA for different storage time

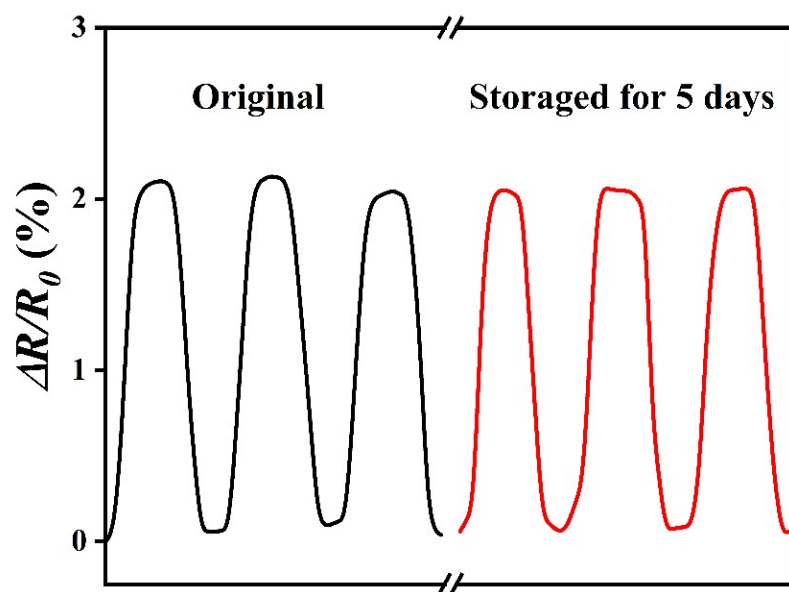

Supplement: d1ra06686b1.pdf [file d1ra06686b1.pdf]
